# Supplementary material for: Genetic architecture of the response of Arabidopsis thaliana to a native plant-growth-promoting bacterial strain
Source: PubMed Central journal article supplement (PMC10665851; doi:10.3389/fpls.2023.1266032), 2023-11-09
Supplement: Presentation_1.pdf [file Presentation_1.pdf]

# Supplementary Information

## Genetic architecture of the response of *Arabidopsis thaliana* to a native plant-growth-promoting bacterial strain

Daniela Ramírez-Sánchez, Chrystel Gibelin-Viala, Fabrice Roux\* and Fabienne Vaillau\*

LIPME, INRAE, CNRS, Université de Toulouse, Castanet-Tolosan, France

\* The authors share senior authorship.

\* Corresponding author: [fabienne.vaillau@inrae.fr](mailto:fabienne.vaillau@inrae.fr) (F. Vaillau)

### **This file includes:**

Supplementary Figures 1-3

Supplementary Tables 1 and 5

(For Supplementary Tables 2-4 and Data set 1, see the Excel file)

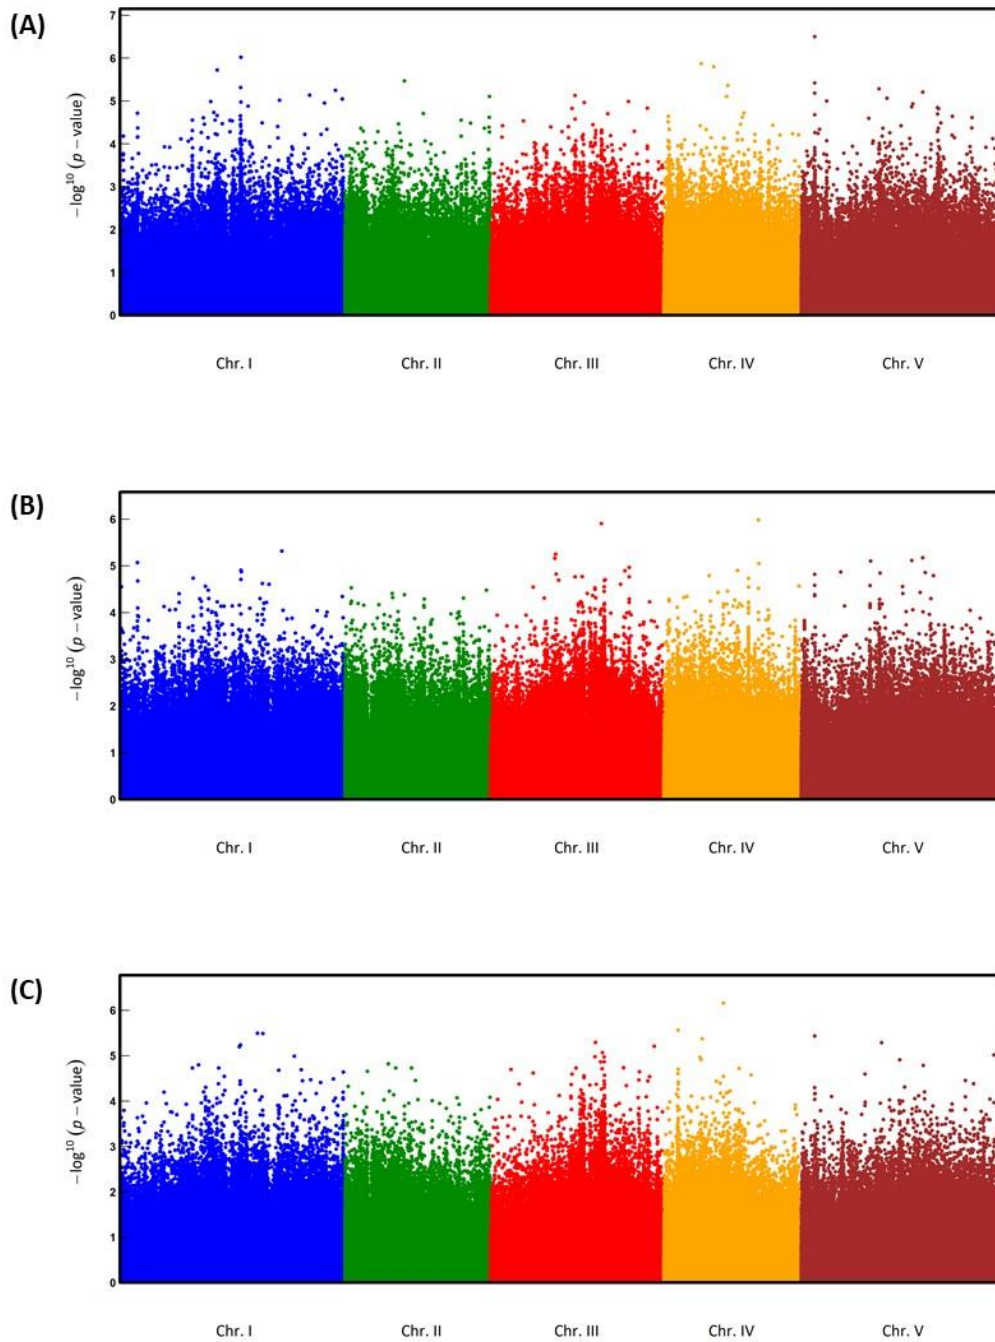

**SUPPLEMENTARY FIGURE S1** | Manhattan plots of mapping results or PGR to OTU6\_Psi\_1 at 14 dai (A), 21 dai (B) and 28 dai (C). The  $x$ -axis corresponds to the physical position of 1,638,649 SNPs on the five chromosomes. The  $y$ -axis indicates the  $-\log_{10}(P)$  of the Spearman's  $\rho$  estimates.

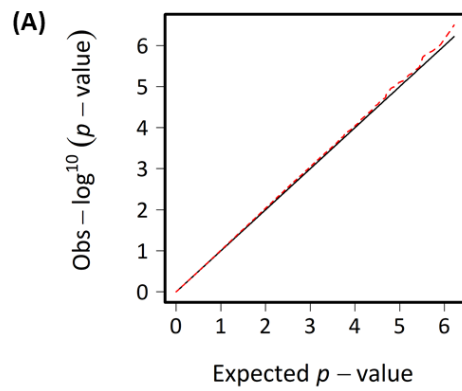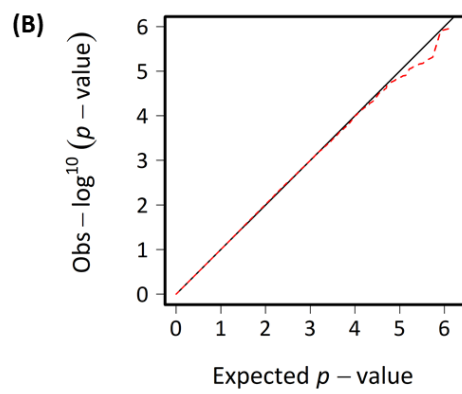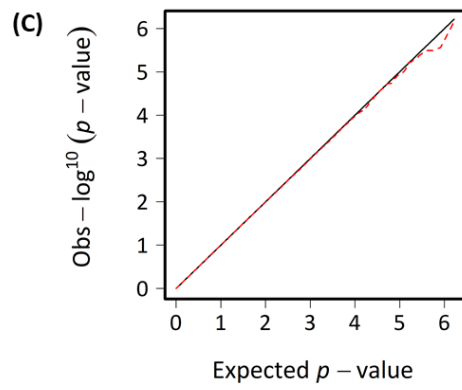

**SUPPLEMENTARY FIGURE S2** | Quantile-quantile plot of  $-\log_{10} p$ -values of the Spearman's  $\rho$  estimates at 14 dai **(A)**, 21 dai **(B)** and 28 dai **(C)**. Solid black line: expected distribution. Dotted red line: observed distribution.

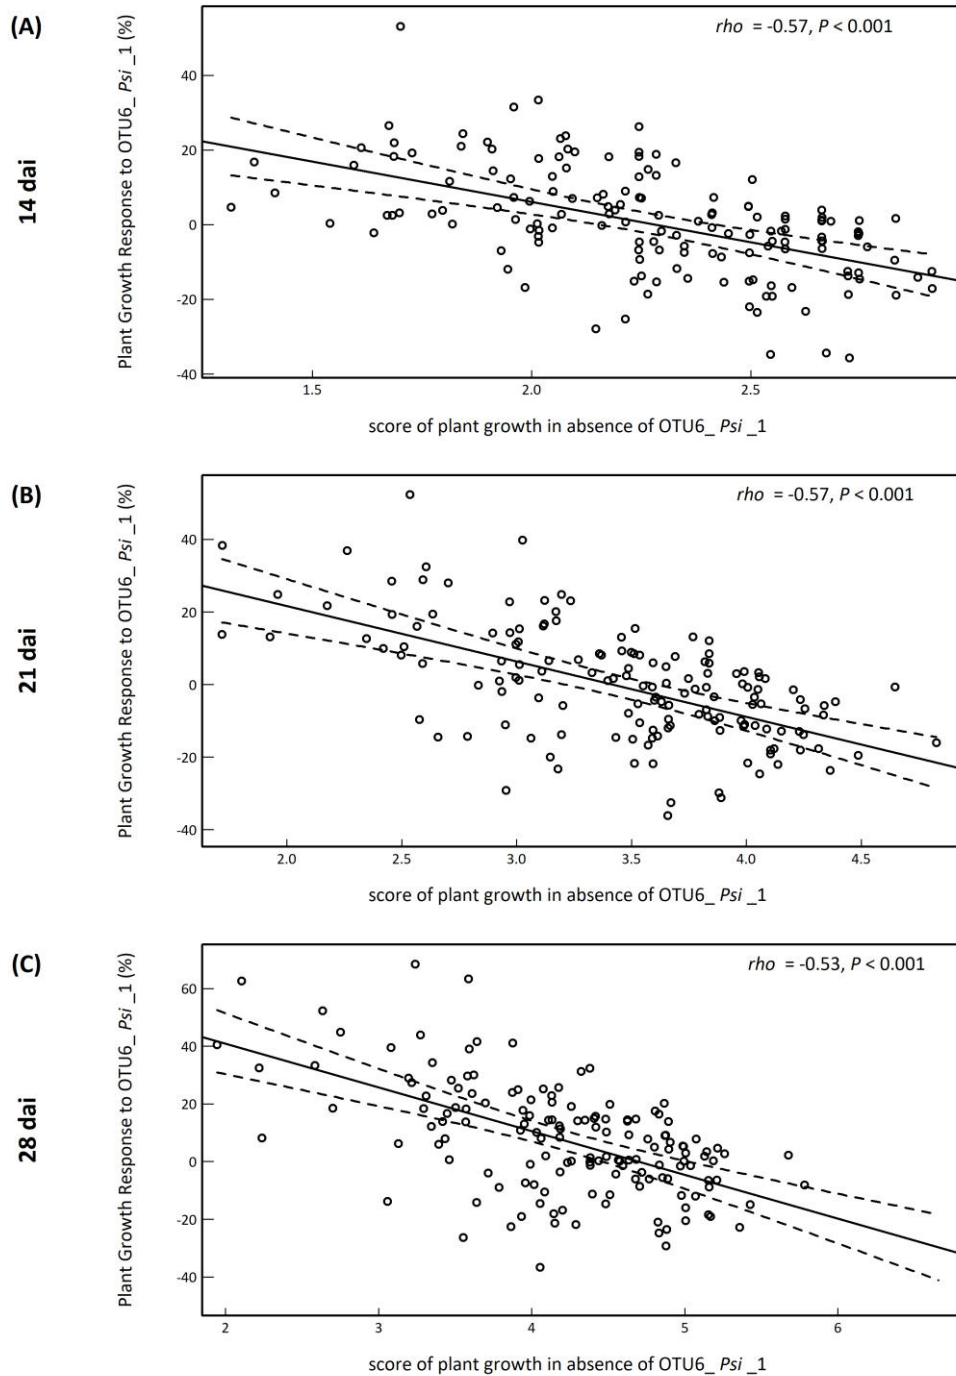

**SUPPLEMENTARY FIGURE S3** | Illustration of the negative trade-offs at the accession level between the level of plant growth response (PGR) to the OTU6\_Psi\_1 strain (expressed in percentage relative to the mock treatment) and the score of plant growth in absence of seed inoculation with OTU6\_Psi\_1, at 14 dai (A), 21 dai (B) and 28 dai (C). Each dot corresponds to the genotypic value of one of the 162 natural accessions of *A. thaliana*.  $\rho$ : correlation coefficient of Spearman between the response to OTU6\_Psi\_1 and the score of plant growth in absence of OTU6\_Psi\_1.  $P$ :  $p$ -value. The solid line corresponds to the fitted regression line, whereas the dashed lines delimit the band of 99% confidence intervals.

**SUPPLEMENTARY TABLE S1** | Names and GPS coordinates (expressed in degrees) of the 54 populations used in this study.

| Population name | Locality                       | Latitude   | Longitude |
|-----------------|--------------------------------|------------|-----------|
| ANGE-B          | Saint Angel, Salvagnac         | 43.91214   | 1.656855  |
| AULO-A          | Aulon                          | 43.190552  | 0.815774  |
| BANI-B          | Banios                         | 43.043644  | 0.234303  |
| BARA-B          | Baraqueville                   | 44.269727  | 2.426322  |
| BELC-C          | Belcastel                      | 44.389212  | 2.336636  |
| CAMA-C          | Camarès                        | 43.824878  | 2.881661  |
| CASS-A          | Cassagne-Begontes              | 44.17653   | 2.518164  |
| CAST-A          | Castelginet                    | 43.698534  | 1.427856  |
| CAZA-B          | Cazaux-Fréchet                 | 42.831484  | 0.420091  |
| CERN-A          | Saint-Rome-de-Cernon           | 44.01194   | 2.966488  |
| CHEI-A          | Chein-dessus                   | 43.013708  | 0.86707   |
| CIER-A          | Cier sur Luchon                | 42.85332   | 0.602039  |
| CIER-B          | Cier de Luchon                 | 42.859978  | 0.600413  |
| CLAR-A          | Saint Clar-de-Rivière          | 43.464776  | 1.219019  |
| CLAR-B          | Saint Clar-de-Rivière          | 43.465281  | 1.218577  |
| CLAR-C          | Saint Clar-de-Rivière          | 43.464058  | 1.21799   |
| COLO-A          | Colombiès                      | 44.346915  | 2.340243  |
| COLO-B          | Colombiès                      | 44.34773   | 2.339715  |
| DECA-A          | Châteaude Cas (Espinac)        | 44.199896  | 1.77189   |
| DIEU-A          | Ville-Dieu-du-temple           | 44.059797  | 1.220975  |
| ESPE-B          | Esperausses                    | 43.693335  | 2.534582  |
| FAYA-A          | Fayet                          | 43.8021    | 2.951709  |
| FERR-A          | Ferrières                      | 43.657743  | 2.44371   |
| GAIL-A          | Gaillac                        | 43.908928  | 1.900574  |
| LABA-B          | Labarthe-sur-Lèze              | 43.450892  | 1.40116   |
| LABA-C          | Labarthe-sur-Lèze              | 43.451451  | 1.39935   |
| LABA-D          | Labarthe-sur-Lèze              | 43.458019  | 1.381137  |
| LABAS-B         | La bastide de Sérou            | 43.008716  | 1.420053  |
| LACR-A          | Lacoste (Montgauch)            | 42.999869  | 1.075659  |
| LACR-C          | Lacoste (Montgauch)            | 43.000155  | 1.075624  |
| LAGR-A          | Lagraulhet St Nicolas          | 43.795323  | 1.073752  |
| LAMA-B          | Lamasquère                     | 43.479745  | 1.241592  |
| LANT-C          | Lanta                          | 43.564822  | 1.65201   |
| LUZE-B          | Luzenac (Garanou)              | 42.764419  | 1.753595  |
| MAZA-A          | Mazamet                        | 43.497754  | 2.375372  |
| MERE-A          | Merens-les-Vals                | 42.656618  | 1.836221  |
| MERV-A          | Merville                       | 43.720426  | 1.296824  |
| MERV-B          | Merville                       | 43.725141  | 1.247629  |
| MONB-A          | Monblanc                       | 43.46529   | 0.986273  |
| MONF-A          | Monferran-Savès                | 43.616254  | 0.972435  |
| MONT-A          | Montans                        | 43.852212  | 1.87432   |
| MONTI-A         | Montiès                        | 43.389383  | 0.67282   |
| MONTI-B         | Montiès                        | 43.3839336 | 0.67257   |
| MONTM-A         | Montmajou (Cier de Luchon)     | 42.86156   | 0.595943  |
| MONTM-B         | Montmajou (Cier de Luchon)     | 42.861218  | 0.596869  |
| MOUL-A          | Moularès                       | 44.089762  | 2.296094  |
| NAUV-B          | Nauviale                       | 44.520418  | 2.427129  |
| NAYR-A          | Le Nayrac (Cassagnes-Bégontes) | 44.161368  | 2.544711  |
| SAMA-A          | Samatan                        | 43.494325  | 0.92391   |
| SAUB-C          | Saubens                        | 43.475583  | 1.367589  |
| SAUR-A          | Saurat                         | 42.889844  | 1.485209  |
| SEIS-A          | Seissan                        | 43.487302  | 0.588798  |
| TARN-C          | Villemur-sur-Tarn              | 43.85328   | 1.502009  |
| VALE-A          | Valence d'Albigeois            | 44.022296  | 2.403434  |

**SUPPLEMENTARAY TABLE S5** | Top SNPs associated with natural variation of plant growth response (PGR) to the OTU6\_*Psi*\_1 strain and presenting suggestive signatures of local adaptation when considering the 1 % upper tail of the XtX distribution. rho: Spearman’s correlation coefficient between the level of PGR to OTU6\_*Psi*\_1 and the standardized allele frequencies of a given top SNP. p-value: level of significance of the rho values.

| trait          | chromosome | position | SNP_ID     | QTL ID | rho    | p-value    | Lindley | XtX value |
|----------------|------------|----------|------------|--------|--------|------------|---------|-----------|
| Response_14dai | 5          | 1774091  | 5_1774091  | QTL11  | 0.384  | 0.00443793 | 7.51    | 191.95    |
| Response_14dai | 5          | 1774283  | 5_1774283  | QTL11  | 0.400  | 0.00295674 | 8.04    | 194.68    |
| Response_14dai | 5          | 1774289  | 5_1774289  | QTL11  | 0.592  | 3.82E-06   | 11.46   | 199.45    |
| Response_21dai | 1          | 11932723 | 1_11932723 | QTL2   | -0.356 | 0.0085815  | 7.40    | 192.50    |
| Response_21dai | 1          | 7986738  | 1_7986738  | QTL1   | 0.428  | 0.00137103 | 0.86    | 192.82    |
| Response_21dai | 1          | 7987167  | 1_7987167  | QTL1   | 0.536  | 3.96E-05   | 4.90    | 199.52    |
| Response_21dai | 4          | 11428185 | 4_11428185 | QTL10  | -0.456 | 0.00060164 | 2.82    | 195.19    |
| Response_21dai | 4          | 11429168 | 4_11429168 | QTL10  | -0.406 | 0.00252046 | 3.85    | 201.90    |
| Response_21dai | 4          | 11430404 | 4_11430404 | QTL10  | 0.089  | 0.52181908 | 9.93    | 197.46    |
| Response_21dai | 4          | 11430678 | 4_11430678 | QTL10  | 0.209  | 0.13001488 | 8.81    | 191.75    |
| Response_21dai | 4          | 11433485 | 4_11433485 | QTL10  | -0.378 | 0.00513639 | 27.02   | 196.39    |
| Response_21dai | 5          | 19313854 | 5_19313854 | QTL15  | -0.402 | 0.00274724 | 2.70    | 212.29    |
| Response_21dai | 5          | 19313916 | 5_19313916 | QTL15  | -0.460 | 0.0005404  | 4.10    | 197.81    |
| Response_21dai | 5          | 420494   | 5_420494   | QTL12  | -0.118 | 0.39416093 | 5.07    | 200.72    |
| Response_21dai | 5          | 422548   | 5_422548   | QTL13  | 0.396  | 0.00325604 | 14.16   | 192.57    |
| Response_28dai | 1          | 11932723 | 1_11932723 | QTL2   | -0.360 | 0.00777792 | 5.45    | 192.50    |
| Response_28dai | 4          | 8024318  | 4_8024318  | QTL8   | -0.390 | 0.0037375  | 0.43    | 199.58    |
| Response_28dai | 5          | 1774091  | 5_1774091  | QTL10  | 0.366  | 0.00685426 | 3.70    | 191.95    |
| Response_28dai | 5          | 1774283  | 5_1774283  | QTL10  | 0.390  | 0.00376641 | 4.13    | 194.68    |
| Response_28dai | 5          | 1774289  | 5_1774289  | QTL10  | 0.593  | 3.70E-06   | 7.56    | 199.45    |
